# Supplementary material for: Selective oxidation of cyclopentene to glutaraldehyde by H2O2 over Nb-SBA-15
Source: Royal Society of Chemistry journal article supplement (doi:10.1039/d1nj02427b), 2021-01-01
Supplement: d1nj02427b4.pdf [file d1nj02427b4.pdf]

## Supporting Information

### Selective oxidation of cyclopentene to glutaraldehyde by $\text{H}_2\text{O}_2$ over Nb-SBA-15

Yingmeng Qi<sup>a</sup>, Qi Han<sup>a</sup>, Li Wu<sup>a</sup>, Jun Li<sup>\*a</sup>

<sup>a</sup> School of Chemical and Environmental Engineering, Shanghai Institute of Technology, Shanghai 201418, China

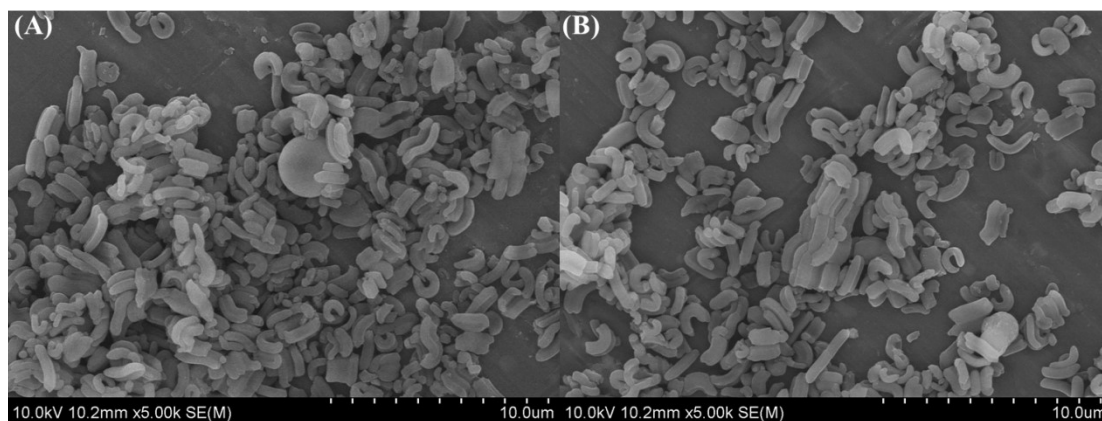

Figure S1 (A) (B) SEM images of 30 wt% Nb-SBA-15

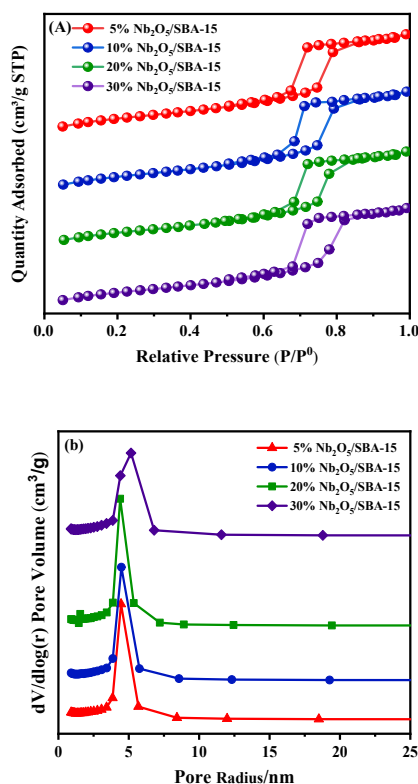

Figure S2 (A)  $\text{N}_2$  adsorption-desorption isotherms and (B) pore size distribution of  $\text{Nb}_2\text{O}_5/\text{SBA-15}$  samples with different loadings.
