# Supplementary figures and images for: Selective oxidation of cyclopentene to glutaraldehyde by H2O2 over Nb-SBA-15
Source: Royal Society of Chemistry journal article supplement (doi:10.1039/d1nj02427b), 2021-01-01

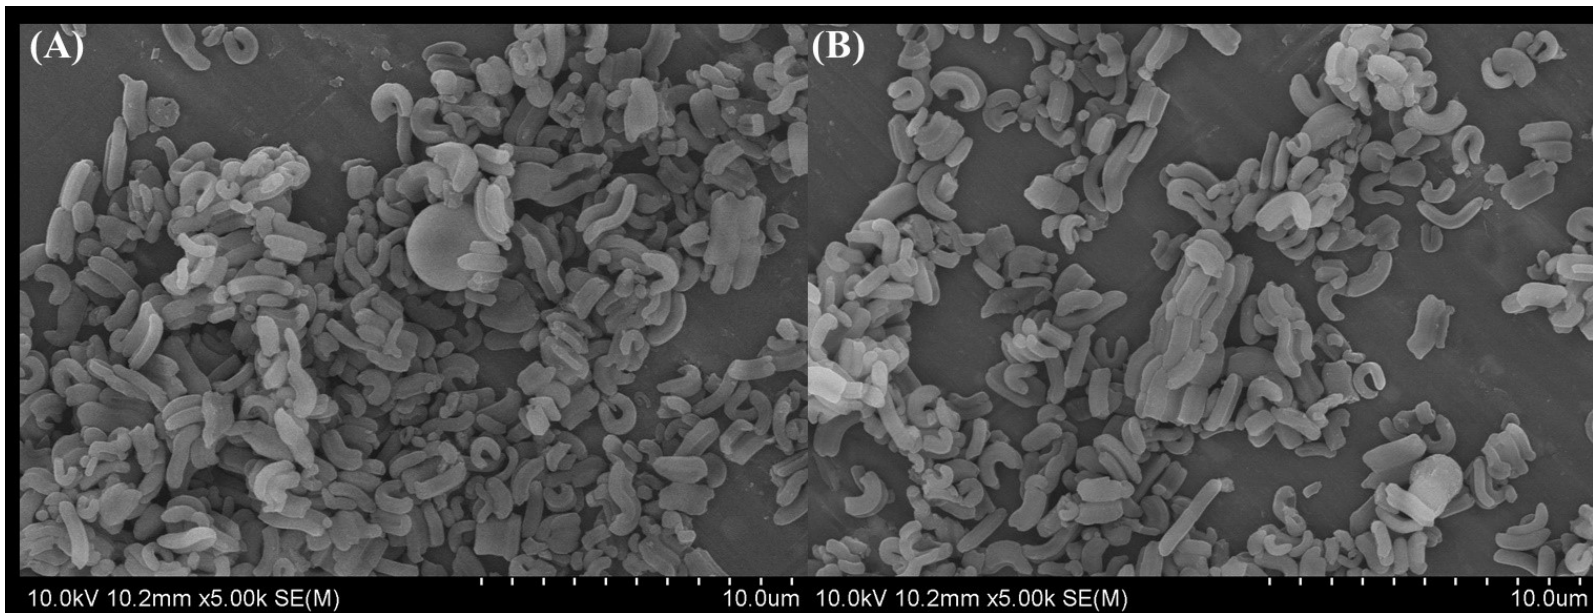

Supplement: d1nj02427b1.pdf [file d1nj02427b1.pdf]

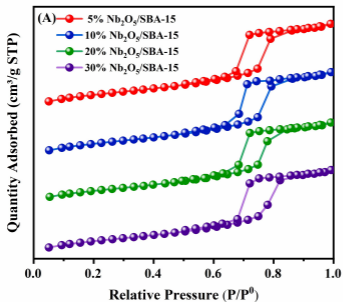

Supplement: d1nj02427b2.pdf [file d1nj02427b2.pdf]

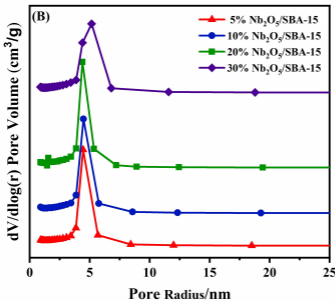

Supplement: d1nj02427b3.pdf [file d1nj02427b3.pdf]
